# Supplementary material
Source: publisher figshare collection journal article supplement (https://acs.figshare.com/ndownloader/files/3967735)
Supplement: Supplementary file 1 [file 3967735]

data_global
_audit_creation_method                  'APEX2 v2010.9-1'

_publ_requested_journal                 'Journal of the American Chemical Society'

_publ_contact_author_name               'Ryan J. Trovitch'
_publ_contact_author_address            
;
Department of Chemistry and Biochemistry
Arizona State University
Tempe, AZ  85287-1604
;
_publ_contact_author_email              'ryan.trovitch@asu.edu'
_publ_contact_author_fax                '480-965-2747'
_publ_contact_author_phone              '480-727-8930'

loop_
_publ_author_name
_publ_author_address
'Tufan K. Mukhopadhyay'
;Department of Chemistry and Biochemistry
Arizona State University
Tempe, AZ 85287
;
'Marco Flores'
;Department of Chemistry and Biochemistry
Arizona State University
Tempe, AZ 85287
;
'Thomas L. Groy'
;Department of Chemistry and Biochemistry
Arizona State University
Tempe, AZ 85287
;
'Ryan J. Trovitch'
;Department of Chemistry and Biochemistry
Arizona State University
Tempe, AZ 85287
;

_publ_section_title                     
;
A Highly Active Manganese Precatalyst for the 
Hydrosilylation of Ketones and Esters 
;
_publ_section_abstract                  
;
;
_publ_section_references                
;
;
_publ_section_comment                   
;
;


data_Ph2PPrPDIMnCl2
_chemical_name_systematic               ?
_chemical_name_common                   ?
_chemical_formula_moiety                'C41 H45 Cl2 Mn N3 O0.50 P2'
_chemical_formula_sum                   'C41 H45 Cl2 Mn N3 O0.50 P2'
_chemical_formula_iupac                 ?
_chemical_formula_weight                775.58

_chemical_melting_point                 ?

_space_group_crystal_system             monoclinic
_space_group_name_H-M_alt               'C 1 2/c 1'
_space_group_name_Hall                  '-C 2yc'
loop_
    _space_group_symop_operation_xyz
    'x, y, z'
    '-x, y, -z+1/2'
    'x+1/2, y+1/2, z'
    '-x+1/2, y+1/2, -z+1/2'
    '-x, -y, -z'
    'x, -y, z-1/2'
    '-x+1/2, -y+1/2, -z'
    'x+1/2, -y+1/2, z-1/2'

_cell_length_a                          16.9540(7)
_cell_length_b                          12.1473(5)
_cell_length_c                          37.0711(15)
_cell_angle_alpha                       90
_cell_angle_beta                        100.2760(10)
_cell_angle_gamma                       90
_cell_volume                            7512.2(5)
_cell_formula_units_Z                   8
_cell_measurement_reflns_used           6580
_cell_measurement_theta_min             2.2037
_cell_measurement_theta_max             25.2720
_cell_measurement_temperature           123.(2)

_exptl_crystal_description              plate
_exptl_crystal_colour                   'clear pale yellow'
_exptl_crystal_size_max                 0.200
_exptl_crystal_size_mid                 0.180
_exptl_crystal_size_min                 0.050
_exptl_crystal_density_diffrn           1.372
_exptl_crystal_density_meas             ?
_exptl_crystal_density_method           'not measured'
_exptl_crystal_F_000                    3240

_exptl_absorpt_coefficient_mu           0.615
_exptl_absorpt_correction_type          multi-scan
_exptl_absorpt_process_details          
    'SADABS Version 2008/1 (Bruker AXS, 2008)'
_exptl_absorpt_correction_T_min         0.90
_exptl_absorpt_correction_T_max         0.97

_exptl_special_details                  
;
; 

_diffrn_ambient_temperature             123.(2)

_diffrn_source                          ?
_diffrn_source_type                     'sealed tube'

_diffrn_radiation_type                  MoK\a
_diffrn_radiation_wavelength            0.71073
_diffrn_radiation_monochromator         graphite

_diffrn_measurement_device_type         'Bruker Smart APEX'
_diffrn_measurement_method              '\w and \f scans'

_diffrn_detector_area_resol_mean        8.3330

_diffrn_reflns_number                   30382
_diffrn_reflns_av_R_equivalents         0.0457
_diffrn_reflns_av_sigmaI/netI           0.0362
_diffrn_reflns_theta_min                2.07
_diffrn_reflns_theta_max                25.35
_diffrn_reflns_theta_full               25.35
_diffrn_measured_fraction_theta_max     1.000
_diffrn_measured_fraction_theta_full    1.000
_diffrn_reflns_limit_h_min              -20
_diffrn_reflns_limit_h_max              20
_diffrn_reflns_limit_k_min              -14
_diffrn_reflns_limit_k_max              14
_diffrn_reflns_limit_l_min              -44
_diffrn_reflns_limit_l_max              44

_refine_special_details                 
;
Refinement of F^2^ against ALL reflections.  The weighted R-factor wR and
goodness of fit S are based on F^2^, conventional R-factors R are based
on F, with F set to zero for negative F^2^. The threshold expression of
F^2^ > 2sigma(F^2^) is used only for calculating R-factors(gt) etc. and is
not relevant to the choice of reflections for refinement.  R-factors based
on F^2^ are statistically about twice as large as those based on F, and R-
factors based on ALL data will be even larger.
;

_reflns_number_total                    6888
_reflns_number_gt                       5693
_reflns_threshold_expression            >2sigma(I)

_refine_ls_structure_factor_coef        Fsqd
_refine_ls_matrix_type                  full
_refine_ls_R_factor_all                 0.0581
_refine_ls_R_factor_gt                  0.0443
_refine_ls_wR_factor_gt                 0.0939
_refine_ls_wR_factor_ref                0.1000
_refine_ls_goodness_of_fit_ref          1.088
_refine_ls_restrained_S_all             1.088
_refine_ls_number_reflns                6888
_refine_ls_number_parameters            453
_refine_ls_number_restraints            1
_refine_ls_hydrogen_treatment           constr
_refine_ls_weighting_scheme             calc
_refine_ls_weighting_details
    'calc w=1/[\s^2^(Fo^2^)+(0.0344P)^2^+18.6484P] where P=(Fo^2^+2Fc^2^)/3'

_atom_sites_solution_hydrogens          geom
_atom_sites_solution_primary            direct
_atom_sites_solution_secondary          difmap

_refine_ls_shift/su_max                 0.000
_refine_ls_shift/su_mean                0.000
_refine_diff_density_max                0.511
_refine_diff_density_min                -1.137
_refine_ls_extinction_method            none
_refine_ls_extinction_coef              ?

loop_
    _atom_type_symbol
    _atom_type_description
    _atom_type_scat_dispersion_real
    _atom_type_scat_dispersion_imag
    _atom_type_scat_source
    C C 0.0033 0.0016 'International Tables Vol C Tables 4.2.6.8 and 6.1.1.4'
    H H 0.0000 0.0000 'International Tables Vol C Tables 4.2.6.8 and 6.1.1.4'
    N N 0.0061 0.0033 'International Tables Vol C Tables 4.2.6.8 and 6.1.1.4'
    P P 0.1023 0.0942 'International Tables Vol C Tables 4.2.6.8 and 6.1.1.4'
    Cl Cl 0.1484 0.1585
     'International Tables Vol C Tables 4.2.6.8 and 6.1.1.4'
    Mn Mn 0.3368 0.7283
     'International Tables Vol C Tables 4.2.6.8 and 6.1.1.4'
    O O 0.0106 0.0060 'International Tables Vol C Tables 4.2.6.8 and 6.1.1.4'

_computing_data_collection              
    'Bruker Instrument Service v2010, 9, 0, 0 (Bruker AXS, 2010)'
_computing_cell_refinement              'SAINT V7.68A (Bruker AXS, 2009)'
_computing_data_reduction               'SAINT V7.68A (Bruker AXS, 2009)'
_computing_structure_solution           'SHELXS-97 (Sheldrick, 2008)'
_computing_structure_refinement         'SHELXL-97 (Sheldrick, 2008)'
_computing_molecular_graphics           'XShell ver. 6.3.1 (Bruker AXS, 2004)'
_computing_publication_material         
    'Bruker APEX2 v2010.9-1 (Bruker AXS, 2010)'

loop_
    _atom_site_type_symbol
    _atom_site_label
    _atom_site_fract_x
    _atom_site_fract_y
    _atom_site_fract_z
    _atom_site_U_iso_or_equiv
    _atom_site_adp_type
    _atom_site_calc_flag
    _atom_site_refinement_flags
    _atom_site_occupancy
    _atom_site_disorder_assembly
    _atom_site_disorder_group
    Mn Mn1 0.28361(3) 0.23614(3) 0.099211(11) 0.01940(11) Uani d . 1.0 . .
    P P1 0.13628(4) 0.27318(6) 0.252728(19) 0.02198(17) Uani d . 1.0 . .
    P P2 0.32772(4) 0.57171(6) -0.00031(2) 0.02006(16) Uani d . 1.0 . .
    Cl Cl1 0.39598(4) 0.31117(6) 0.137742(19) 0.02669(17) Uani d . 1.0 . .
    Cl Cl2 0.18700(4) 0.37255(6) 0.076645(19) 0.02477(16) Uani d . 1.0 . .
    N N1 0.21292(14) 0.18014(19) 0.14345(6) 0.0208(5) Uani d . 1.0 . .
    N N2 0.28047(13) 0.05540(18) 0.09968(6) 0.0201(5) Uani d . 1.0 . .
    N N3 0.34036(13) 0.16909(18) 0.05053(6) 0.0192(5) Uani d . 1.0 . .
    C C1 0.1614(2) 0.0217(3) 0.17506(8) 0.0320(7) Uani d . 1.0 . .
    H H1A 0.1385 0.078 0.1891 0.048 Uiso calc R 1.0 . .
    H H1B 0.1987 -0.0244 0.1918 0.048 Uiso calc R 1.0 . .
    H H1C 0.1182 -0.0241 0.1618 0.048 Uiso calc R 1.0 . .
    C C2 0.20555(17) 0.0766(2) 0.14812(7) 0.0225(6) Uani d . 1.0 . .
    C C3 0.24576(16) 0.0030(2) 0.12471(7) 0.0205(6) Uani d . 1.0 . .
    C C4 0.24958(17) -0.1104(2) 0.12844(8) 0.0247(6) Uani d . 1.0 . .
    H H4 0.224 -0.1465 0.146 0.03 Uiso calc R 1.0 . .
    C C5 0.29076(17) -0.1700(2) 0.10643(8) 0.0258(7) Uani d . 1.0 . .
    H H5 0.2942 -0.2478 0.1087 0.031 Uiso calc R 1.0 . .
    C C6 0.32738(17) -0.1162(2) 0.08080(8) 0.0243(6) Uani d . 1.0 . .
    H H6 0.3565 -0.1564 0.0655 0.029 Uiso calc R 1.0 . .
    C C7 0.32065(16) -0.0026(2) 0.07794(7) 0.0195(6) Uani d . 1.0 . .
    C C8 0.35507(16) 0.0655(2) 0.05069(7) 0.0205(6) Uani d . 1.0 . .
    C C9 0.40370(19) 0.0098(2) 0.02592(8) 0.0291(7) Uani d . 1.0 . .
    H H9A 0.3748 0.013 0.0006 0.044 Uiso calc R 1.0 . .
    H H9B 0.4126 -0.0673 0.0333 0.044 Uiso calc R 1.0 . .
    H H9C 0.4555 0.0471 0.0277 0.044 Uiso calc R 1.0 . .
    C C10 0.17928(18) 0.2596(2) 0.16627(7) 0.0245(6) Uani d . 1.0 . .
    H H10A 0.1291 0.2297 0.1726 0.029 Uiso calc R 1.0 . .
    H H10B 0.166 0.3287 0.1523 0.029 Uiso calc R 1.0 . .
    C C11 0.23824(18) 0.2842(2) 0.20123(8) 0.0259(6) Uani d . 1.0 . .
    H H11A 0.2855 0.3229 0.195 0.031 Uiso calc R 1.0 . .
    H H11B 0.2569 0.2141 0.2135 0.031 Uiso calc R 1.0 . .
    C C12 0.19956(18) 0.3557(2) 0.22752(7) 0.0245(6) Uani d . 1.0 . .
    H H12A 0.1665 0.4137 0.2134 0.029 Uiso calc R 1.0 . .
    H H12B 0.2421 0.3924 0.2452 0.029 Uiso calc R 1.0 . .
    C C13 0.10237(16) 0.3766(2) 0.28298(7) 0.0216(6) Uani d . 1.0 . .
    C C14 0.11898(18) 0.4885(2) 0.28183(8) 0.0288(7) Uani d . 1.0 . .
    H H14 0.149 0.5154 0.2644 0.035 Uiso calc R 1.0 . .
    C C15 0.09222(18) 0.5614(3) 0.30588(9) 0.0317(7) Uani d . 1.0 . .
    H H15 0.1042 0.6376 0.3049 0.038 Uiso calc R 1.0 . .
    C C16 0.04820(17) 0.5232(3) 0.33128(8) 0.0290(7) Uani d . 1.0 . .
    H H16 0.0307 0.5728 0.348 0.035 Uiso calc R 1.0 . .
    C C17 0.02981(18) 0.4129(3) 0.33223(8) 0.0304(7) Uani d . 1.0 . .
    H H17 -0.001 0.3865 0.3495 0.036 Uiso calc R 1.0 . .
    C C18 0.05624(17) 0.3403(3) 0.30809(8) 0.0276(7) Uani d . 1.0 . .
    H H18 0.0426 0.2645 0.3087 0.033 Uiso calc R 1.0 . .
    C C19 0.21145(17) 0.1996(2) 0.28650(7) 0.0229(6) Uani d . 1.0 . .
    C C20 0.29288(18) 0.2226(2) 0.29326(8) 0.0280(7) Uani d . 1.0 . .
    H H20 0.3132 0.2789 0.2796 0.034 Uiso calc R 1.0 . .
    C C21 0.3450(2) 0.1649(3) 0.31954(9) 0.0367(8) Uani d . 1.0 . .
    H H21 0.4007 0.1813 0.3236 0.044 Uiso calc R 1.0 . .
    C C22 0.3164(2) 0.0831(3) 0.33989(8) 0.0348(8) Uani d . 1.0 . .
    H H22 0.3521 0.0449 0.3583 0.042 Uiso calc R 1.0 . .
    C C23 0.2364(2) 0.0578(3) 0.33329(9) 0.0375(8) Uani d . 1.0 . .
    H H23 0.2165 0.0015 0.347 0.045 Uiso calc R 1.0 . .
    C C24 0.1842(2) 0.1146(3) 0.30637(9) 0.0333(7) Uani d . 1.0 . .
    H H24 0.1291 0.0952 0.3015 0.04 Uiso calc R 1.0 . .
    C C25 0.37088(17) 0.2379(2) 0.02318(7) 0.0207(6) Uani d . 1.0 . .
    H H25A 0.3513 0.2087 -0.0017 0.025 Uiso calc R 1.0 . .
    H H25B 0.4302 0.2358 0.0278 0.025 Uiso calc R 1.0 . .
    C C26 0.34271(17) 0.3552(2) 0.02559(7) 0.0215(6) Uani d . 1.0 . .
    H H26A 0.3643 0.3844 0.0503 0.026 Uiso calc R 1.0 . .
    H H26B 0.2835 0.3557 0.0225 0.026 Uiso calc R 1.0 . .
    C C27 0.36836(17) 0.4307(2) -0.00312(7) 0.0200(6) Uani d . 1.0 . .
    H H27A 0.3489 0.4002 -0.0279 0.024 Uiso calc R 1.0 . .
    H H27B 0.4276 0.434 0.0007 0.024 Uiso calc R 1.0 . .
    C C28 0.39168(16) 0.6162(2) 0.04251(8) 0.0208(6) Uani d . 1.0 . .
    C C29 0.36976(17) 0.5809(2) 0.07537(8) 0.0238(6) Uani d . 1.0 . .
    H H29 0.3206 0.543 0.0748 0.029 Uiso calc R 1.0 . .
    C C30 0.41930(19) 0.6010(2) 0.10860(8) 0.0300(7) Uani d . 1.0 . .
    H H30 0.4053 0.5735 0.1306 0.036 Uiso calc R 1.0 . .
    C C31 0.48881(19) 0.6607(3) 0.10992(9) 0.0335(7) Uani d . 1.0 . .
    H H31 0.5225 0.6744 0.1328 0.04 Uiso calc R 1.0 . .
    C C32 0.50965(18) 0.7006(3) 0.07802(9) 0.0315(7) Uani d . 1.0 . .
    H H32 0.5567 0.7439 0.0791 0.038 Uiso calc R 1.0 . .
    C C33 0.46173(17) 0.6775(2) 0.04439(8) 0.0244(6) Uani d . 1.0 . .
    H H33 0.4769 0.7037 0.0225 0.029 Uiso calc R 1.0 . .
    C C34 0.37237(16) 0.6461(2) -0.03462(7) 0.0214(6) Uani d . 1.0 . .
    C C35 0.35460(17) 0.7581(2) -0.03917(8) 0.0257(6) Uani d . 1.0 . .
    H H35 0.3206 0.7919 -0.0246 0.031 Uiso calc R 1.0 . .
    C C36 0.38583(18) 0.8207(2) -0.06454(8) 0.0296(7) Uani d . 1.0 . .
    H H36 0.3736 0.8969 -0.0671 0.036 Uiso calc R 1.0 . .
    C C37 0.43494(18) 0.7717(3) -0.08610(8) 0.0293(7) Uani d . 1.0 . .
    H H37 0.4572 0.8146 -0.1032 0.035 Uiso calc R 1.0 . .
    C C38 0.45142(17) 0.6600(3) -0.08262(8) 0.0271(7) Uani d . 1.0 . .
    H H38 0.4838 0.626 -0.0978 0.033 Uiso calc R 1.0 . .
    C C39 0.42070(16) 0.5981(2) -0.05699(7) 0.0232(6) Uani d . 1.0 . .
    H H39 0.4327 0.5218 -0.0546 0.028 Uiso calc R 1.0 . .
    O O1A 0.4253(4) 0.3997(6) 0.26698(19) 0.0443(12) Uani d PG 0.3350(18) A -1
    C C2A 0.4401(4) 0.3146(6) 0.2418(2) 0.0443(12) Uani d PG 0.3350(18) A -1
    H H2AA 0.4045 0.3241 0.2178 0.053 Uiso calc PR 0.3350(18) A -1
    H H2AB 0.4302 0.241 0.2516 0.053 Uiso calc PR 0.3350(18) A -1
    C C3A 0.5283(4) 0.3260(7) 0.2378(3) 0.0443(12) Uani d PG 0.3350(18) A -1
    H H3AA 0.5368 0.3013 0.2134 0.053 Uiso calc PR 0.3350(18) A -1
    H H3AB 0.564 0.284 0.257 0.053 Uiso calc PR 0.3350(18) A -1
    C C4A 0.5413(5) 0.4508(7) 0.2428(2) 0.0443(12) Uani d PG 0.3350(18) A -1
    H H4AA 0.5986 0.4687 0.2512 0.053 Uiso calc PR 0.3350(18) A -1
    H H4AB 0.5212 0.4913 0.2198 0.053 Uiso calc PR 0.3350(18) A -1
    C C5A 0.4913(6) 0.4765(6) 0.2724(2) 0.0443(12) Uani d PG 0.3350(18) A -1
    H H5AA 0.5241 0.4672 0.2971 0.053 Uiso calc PR 0.3350(18) A -1
    H H5AB 0.4712 0.5531 0.27 0.053 Uiso calc PR 0.3350(18) A -1
    O O1B 0.4697(17) 0.2874(15) 0.2644(8) 0.0443(12) Uani d PG 0.113(3) B -2
    C C2B 0.4250(14) 0.386(2) 0.2694(7) 0.0443(12) Uani d PG 0.113(3) B -2
    H H2BA 0.4454 0.419 0.2936 0.053 Uiso calc PR 0.113(3) B -2
    H H2BB 0.3675 0.3681 0.2679 0.053 Uiso calc PR 0.113(3) B -2
    C C3B 0.4366(13) 0.4648(18) 0.2385(7) 0.0443(12) Uani d PG 0.113(3) B -2
    H H3BA 0.4339 0.5426 0.2461 0.053 Uiso calc PR 0.113(3) B -2
    H H3BB 0.3963 0.452 0.2161 0.053 Uiso calc PR 0.113(3) B -2
    C C4B 0.5215(14) 0.434(2) 0.2327(8) 0.0443(12) Uani d PG 0.113(3) B -2
    H H4BA 0.5299 0.4536 0.2077 0.053 Uiso calc PR 0.113(3) B -2
    H H4BB 0.5631 0.4699 0.251 0.053 Uiso calc PR 0.113(3) B -2
    C C5B 0.5212(18) 0.3087(19) 0.2381(10) 0.0443(12) Uani d PG 0.113(3) B -2
    H H5BA 0.5006 0.2712 0.2146 0.053 Uiso calc PR 0.113(3) B -2
    H H5BB 0.5762 0.2817 0.2475 0.053 Uiso calc PR 0.113(3) B -2
    O O1C 0.449(2) 0.287(3) 0.2657(12) 0.0443(12) Uani d PG 0.052(3) C -3
    C C2C 0.518(3) 0.288(3) 0.2951(13) 0.0443(12) Uani d PG 0.052(3) C -3
    H H2CA 0.5669 0.2678 0.2859 0.053 Uiso calc PR 0.052(3) C -3
    H H2CB 0.5098 0.2356 0.3145 0.053 Uiso calc PR 0.052(3) C -3
    C C3C 0.524(3) 0.406(4) 0.3101(12) 0.0443(12) Uani d PG 0.052(3) C -3
    H H3CA 0.5805 0.426 0.3203 0.053 Uiso calc PR 0.052(3) C -3
    H H3CB 0.491 0.4167 0.3293 0.053 Uiso calc PR 0.052(3) C -3
    C C4C 0.492(4) 0.473(3) 0.2755(15) 0.0443(12) Uani d PG 0.052(3) C -3
    H H4CA 0.4707 0.5457 0.2817 0.053 Uiso calc PR 0.052(3) C -3
    H H4CB 0.5333 0.4848 0.2602 0.053 Uiso calc PR 0.052(3) C -3
    C C5C 0.424(3) 0.398(4) 0.2563(12) 0.0443(12) Uani d PG 0.052(3) C -3
    H H5CA 0.3734 0.415 0.2648 0.053 Uiso calc PR 0.052(3) C -3
    H H5CB 0.4159 0.409 0.2294 0.053 Uiso calc PR 0.052(3) C -3

loop_
    _atom_site_aniso_label
    _atom_site_aniso_U_11
    _atom_site_aniso_U_22
    _atom_site_aniso_U_33
    _atom_site_aniso_U_12
    _atom_site_aniso_U_13
    _atom_site_aniso_U_23
    Mn1 0.0275(2) 0.0155(2) 0.0169(2) 0.00015(17) 0.00883(17) 0.00001(17)
    P1 0.0250(4) 0.0229(4) 0.0188(4) 0.0002(3) 0.0061(3) -0.0023(3)
    P2 0.0212(4) 0.0208(4) 0.0197(4) 0.0014(3) 0.0078(3) 0.0017(3)
    Cl1 0.0305(4) 0.0280(4) 0.0229(4) -0.0059(3) 0.0082(3) -0.0008(3)
    Cl2 0.0297(4) 0.0227(4) 0.0238(4) 0.0041(3) 0.0101(3) 0.0038(3)
    N1 0.0249(12) 0.0228(13) 0.0153(11) 0.0029(10) 0.0055(10) 0.0010(10)
    N2 0.0264(12) 0.0183(12) 0.0167(11) -0.0024(10) 0.0064(10) -0.0001(10)
    N3 0.0252(12) 0.0187(12) 0.0142(11) -0.0008(10) 0.0053(9) 0.0000(9)
    C1 0.0419(19) 0.0288(17) 0.0299(17) 0.0010(14) 0.0187(15) 0.0040(14)
    C2 0.0262(15) 0.0267(16) 0.0152(13) -0.0004(12) 0.0049(12) 0.0023(12)
    C3 0.0222(14) 0.0216(14) 0.0176(14) -0.0017(12) 0.0036(11) 0.0014(11)
    C4 0.0291(16) 0.0225(15) 0.0221(15) -0.0029(12) 0.0038(12) 0.0050(12)
    C5 0.0335(16) 0.0156(14) 0.0274(16) -0.0009(12) 0.0026(13) 0.0020(12)
    C6 0.0282(16) 0.0222(15) 0.0228(15) 0.0025(12) 0.0048(12) -0.0024(12)
    C7 0.0220(14) 0.0205(14) 0.0160(14) -0.0017(11) 0.0032(11) -0.0029(11)
    C8 0.0222(14) 0.0234(15) 0.0160(13) -0.0011(12) 0.0038(11) -0.0033(11)
    C9 0.0369(18) 0.0237(15) 0.0313(17) 0.0015(13) 0.0182(14) -0.0017(13)
    C10 0.0330(16) 0.0251(15) 0.0175(14) 0.0060(13) 0.0103(12) 0.0019(12)
    C11 0.0315(16) 0.0274(16) 0.0209(15) 0.0033(13) 0.0108(13) -0.0005(12)
    C12 0.0321(16) 0.0246(15) 0.0188(14) 0.0030(13) 0.0098(12) -0.0009(12)
    C13 0.0204(14) 0.0262(15) 0.0176(14) 0.0037(12) 0.0024(11) -0.0018(12)
    C14 0.0319(17) 0.0314(17) 0.0256(16) 0.0030(14) 0.0122(13) 0.0003(13)
    C15 0.0354(18) 0.0227(16) 0.0375(18) 0.0035(13) 0.0079(14) -0.0038(14)
    C16 0.0275(16) 0.0340(17) 0.0263(16) 0.0079(13) 0.0066(13) -0.0070(13)
    C17 0.0292(16) 0.0390(19) 0.0260(16) 0.0033(14) 0.0127(13) 0.0005(14)
    C18 0.0283(16) 0.0278(16) 0.0270(16) 0.0006(13) 0.0061(13) -0.0020(13)
    C19 0.0302(16) 0.0202(14) 0.0197(14) 0.0045(12) 0.0082(12) -0.0038(12)
    C20 0.0323(17) 0.0243(15) 0.0273(16) 0.0011(13) 0.0050(13) -0.0040(13)
    C21 0.0366(18) 0.0328(18) 0.0369(19) 0.0057(15) -0.0036(15) -0.0087(15)
    C22 0.050(2) 0.0281(17) 0.0238(16) 0.0112(15) -0.0008(15) -0.0028(13)
    C23 0.054(2) 0.0290(17) 0.0340(18) 0.0136(16) 0.0202(16) 0.0099(15)
    C24 0.0344(18) 0.0311(17) 0.0373(18) 0.0043(14) 0.0143(15) 0.0045(15)
    C25 0.0256(15) 0.0214(14) 0.0164(13) -0.0050(12) 0.0075(11) -0.0014(11)
    C26 0.0262(15) 0.0223(14) 0.0178(14) -0.0015(12) 0.0088(12) 0.0005(12)
    C27 0.0247(15) 0.0193(14) 0.0172(13) -0.0004(11) 0.0068(11) -0.0002(11)
    C28 0.0247(14) 0.0155(13) 0.0236(14) 0.0037(11) 0.0079(12) -0.0017(11)
    C29 0.0280(16) 0.0188(14) 0.0265(15) -0.0010(12) 0.0099(13) -0.0043(12)
    C30 0.0426(19) 0.0276(16) 0.0204(15) 0.0035(14) 0.0068(14) -0.0031(13)
    C31 0.0369(18) 0.0319(17) 0.0290(17) 0.0018(14) -0.0017(14) -0.0102(14)
    C32 0.0269(16) 0.0268(16) 0.0409(19) -0.0010(13) 0.0059(14) -0.0084(14)
    C33 0.0252(15) 0.0205(15) 0.0296(16) 0.0048(12) 0.0107(13) -0.0003(12)
    C34 0.0246(15) 0.0224(14) 0.0172(14) 0.0001(12) 0.0036(11) 0.0029(12)
    C35 0.0297(16) 0.0213(15) 0.0261(15) 0.0016(12) 0.0049(13) -0.0012(12)
    C36 0.0349(17) 0.0212(15) 0.0305(17) 0.0009(13) -0.0001(14) 0.0066(13)
    C37 0.0295(16) 0.0345(17) 0.0235(15) -0.0062(14) 0.0034(13) 0.0110(14)
    C38 0.0257(15) 0.0337(17) 0.0222(15) 0.0006(13) 0.0047(12) 0.0011(13)
    C39 0.0238(15) 0.0227(15) 0.0230(15) 0.0004(12) 0.0038(12) 0.0025(12)
    O1A 0.039(2) 0.057(3) 0.041(2) -0.010(2) 0.0166(18) -0.0161(19)
    C2A 0.039(2) 0.057(3) 0.041(2) -0.010(2) 0.0166(18) -0.0161(19)
    C3A 0.039(2) 0.057(3) 0.041(2) -0.010(2) 0.0166(18) -0.0161(19)
    C4A 0.039(2) 0.057(3) 0.041(2) -0.010(2) 0.0166(18) -0.0161(19)
    C5A 0.039(2) 0.057(3) 0.041(2) -0.010(2) 0.0166(18) -0.0161(19)
    O1B 0.039(2) 0.057(3) 0.041(2) -0.010(2) 0.0166(18) -0.0161(19)
    C2B 0.039(2) 0.057(3) 0.041(2) -0.010(2) 0.0166(18) -0.0161(19)
    C3B 0.039(2) 0.057(3) 0.041(2) -0.010(2) 0.0166(18) -0.0161(19)
    C4B 0.039(2) 0.057(3) 0.041(2) -0.010(2) 0.0166(18) -0.0161(19)
    C5B 0.039(2) 0.057(3) 0.041(2) -0.010(2) 0.0166(18) -0.0161(19)
    O1C 0.039(2) 0.057(3) 0.041(2) -0.010(2) 0.0166(18) -0.0161(19)
    C2C 0.039(2) 0.057(3) 0.041(2) -0.010(2) 0.0166(18) -0.0161(19)
    C3C 0.039(2) 0.057(3) 0.041(2) -0.010(2) 0.0166(18) -0.0161(19)
    C4C 0.039(2) 0.057(3) 0.041(2) -0.010(2) 0.0166(18) -0.0161(19)
    C5C 0.039(2) 0.057(3) 0.041(2) -0.010(2) 0.0166(18) -0.0161(19)

_geom_special_details                   
;
All esds (except the esd in the dihedral angle between two l.s. planes)
are estimated using the full covariance matrix.  The cell esds are taken
into account individually in the estimation of esds in distances, angles
and torsion angles; correlations between esds in cell parameters are only
used when they are defined by crystal symmetry.  An approximate (isotropic)
treatment of cell esds is used for estimating esds involving l.s. planes.
;

loop_
    _geom_bond_atom_site_label_1
    _geom_bond_atom_site_label_2
    _geom_bond_site_symmetry_2
    _geom_bond_distance
    _geom_bond_publ_flag
    Mn1 N2 . 2.196(2) ?
    Mn1 N1 . 2.300(2) ?
    Mn1 N3 . 2.338(2) ?
    Mn1 Cl1 . 2.3514(8) ?
    Mn1 Cl2 . 2.3748(8) ?
    P1 C12 . 1.841(3) ?
    P1 C13 . 1.843(3) ?
    P1 C19 . 1.850(3) ?
    P2 C34 . 1.831(3) ?
    P2 C28 . 1.837(3) ?
    P2 C27 . 1.856(3) ?
    N1 C2 . 1.278(4) ?
    N1 C10 . 1.465(3) ?
    N2 C7 . 1.344(3) ?
    N2 C3 . 1.344(3) ?
    N3 C8 . 1.282(3) ?
    N3 C25 . 1.477(3) ?
    C1 C2 . 1.506(4) ?
    C1 H1A . 0.98 ?
    C1 H1B . 0.98 ?
    C1 H1C . 0.98 ?
    C2 C3 . 1.493(4) ?
    C3 C4 . 1.385(4) ?
    C4 C5 . 1.371(4) ?
    C4 H4 . 0.95 ?
    C5 C6 . 1.387(4) ?
    C5 H5 . 0.95 ?
    C6 C7 . 1.387(4) ?
    C6 H6 . 0.95 ?
    C7 C8 . 1.502(4) ?
    C8 C9 . 1.501(4) ?
    C9 H9A . 0.98 ?
    C9 H9B . 0.98 ?
    C9 H9C . 0.98 ?
    C10 C11 . 1.518(4) ?
    C10 H10A . 0.99 ?
    C10 H10B . 0.99 ?
    C11 C12 . 1.538(4) ?
    C11 H11A . 0.99 ?
    C11 H11B . 0.99 ?
    C12 H12A . 0.99 ?
    C12 H12B . 0.99 ?
    C13 C18 . 1.390(4) ?
    C13 C14 . 1.390(4) ?
    C14 C15 . 1.389(4) ?
    C14 H14 . 0.95 ?
    C15 C16 . 1.382(4) ?
    C15 H15 . 0.95 ?
    C16 C17 . 1.377(4) ?
    C16 H16 . 0.95 ?
    C17 C18 . 1.386(4) ?
    C17 H17 . 0.95 ?
    C18 H18 . 0.95 ?
    C19 C20 . 1.387(4) ?
    C19 C24 . 1.393(4) ?
    C20 C21 . 1.384(4) ?
    C20 H20 . 0.95 ?
    C21 C22 . 1.386(5) ?
    C21 H21 . 0.95 ?
    C22 C23 . 1.371(5) ?
    C22 H22 . 0.95 ?
    C23 C24 . 1.393(4) ?
    C23 H23 . 0.95 ?
    C24 H24 . 0.95 ?
    C25 C26 . 1.510(4) ?
    C25 H25A . 0.99 ?
    C25 H25B . 0.99 ?
    C26 C27 . 1.526(4) ?
    C26 H26A . 0.99 ?
    C26 H26B . 0.99 ?
    C27 H27A . 0.99 ?
    C27 H27B . 0.99 ?
    C28 C33 . 1.393(4) ?
    C28 C29 . 1.402(4) ?
    C29 C30 . 1.383(4) ?
    C29 H29 . 0.95 ?
    C30 C31 . 1.377(4) ?
    C30 H30 . 0.95 ?
    C31 C32 . 1.381(4) ?
    C31 H31 . 0.95 ?
    C32 C33 . 1.390(4) ?
    C32 H32 . 0.95 ?
    C33 H33 . 0.95 ?
    C34 C39 . 1.393(4) ?
    C34 C35 . 1.398(4) ?
    C35 C36 . 1.385(4) ?
    C35 H35 . 0.95 ?
    C36 C37 . 1.387(4) ?
    C36 H36 . 0.95 ?
    C37 C38 . 1.387(4) ?
    C37 H37 . 0.95 ?
    C38 C39 . 1.385(4) ?
    C38 H38 . 0.95 ?
    C39 H39 . 0.95 ?
    O1A C5A . 1.4432 ?
    O1A C2A . 1.4435 ?
    C2A C3A . 1.5348 ?
    C2A H2AA . 0.99 ?
    C2A H2AB . 0.99 ?
    C3A C4A . 1.5388 ?
    C3A H3AA . 0.99 ?
    C3A H3AB . 0.99 ?
    C4A C5A . 1.535 ?
    C4A H4AA . 0.99 ?
    C4A H4AB . 0.99 ?
    C5A H5AA . 0.99 ?
    C5A H5AB . 0.99 ?
    O1B C2B . 1.4433 ?
    O1B C5B . 1.4434 ?
    C2B C3B . 1.5348 ?
    C2B H2BA . 0.99 ?
    C2B H2BB . 0.99 ?
    C3B C4B . 1.5387 ?
    C3B H3BA . 0.99 ?
    C3B H3BB . 0.99 ?
    C4B C5B . 1.5349 ?
    C4B H4BA . 0.99 ?
    C4B H4BB . 0.99 ?
    C5B H5BA . 0.99 ?
    C5B H5BB . 0.99 ?
    O1C C2C . 1.4432 ?
    O1C C5C . 1.4433 ?
    C2C C3C . 1.535 ?
    C2C H2CA . 0.99 ?
    C2C H2CB . 0.99 ?
    C3C C4C . 1.5386 ?
    C3C H3CA . 0.99 ?
    C3C H3CB . 0.99 ?
    C4C C5C . 1.5349 ?
    C4C H4CA . 0.99 ?
    C4C H4CB . 0.99 ?
    C5C H5CA . 0.99 ?
    C5C H5CB . 0.99 ?

loop_
    _geom_angle_atom_site_label_1
    _geom_angle_atom_site_label_2
    _geom_angle_atom_site_label_3
    _geom_angle_site_symmetry_1
    _geom_angle_site_symmetry_3
    _geom_angle
    _geom_angle_publ_flag
    N2 Mn1 N1 . . 71.47(8) ?
    N2 Mn1 N3 . . 70.84(8) ?
    N1 Mn1 N3 . . 141.81(8) ?
    N2 Mn1 Cl1 . . 113.63(6) ?
    N1 Mn1 Cl1 . . 98.64(6) ?
    N3 Mn1 Cl1 . . 101.75(6) ?
    N2 Mn1 Cl2 . . 133.16(7) ?
    N1 Mn1 Cl2 . . 92.47(6) ?
    N3 Mn1 Cl2 . . 108.91(6) ?
    Cl1 Mn1 Cl2 . . 112.13(3) ?
    C12 P1 C13 . . 102.19(13) ?
    C12 P1 C19 . . 102.32(13) ?
    C13 P1 C19 . . 99.76(12) ?
    C34 P2 C28 . . 101.65(13) ?
    C34 P2 C27 . . 102.29(12) ?
    C28 P2 C27 . . 98.73(12) ?
    C2 N1 C10 . . 120.8(2) ?
    C2 N1 Mn1 . . 117.61(18) ?
    C10 N1 Mn1 . . 121.53(17) ?
    C7 N2 C3 . . 119.8(2) ?
    C7 N2 Mn1 . . 120.26(17) ?
    C3 N2 Mn1 . . 119.54(18) ?
    C8 N3 C25 . . 117.8(2) ?
    C8 N3 Mn1 . . 116.39(18) ?
    C25 N3 Mn1 . . 125.12(16) ?
    C2 C1 H1A . . 109.5 ?
    C2 C1 H1B . . 109.5 ?
    H1A C1 H1B . . 109.5 ?
    C2 C1 H1C . . 109.5 ?
    H1A C1 H1C . . 109.5 ?
    H1B C1 H1C . . 109.5 ?
    N1 C2 C3 . . 116.4(2) ?
    N1 C2 C1 . . 126.7(3) ?
    C3 C2 C1 . . 116.9(2) ?
    N2 C3 C4 . . 121.4(3) ?
    N2 C3 C2 . . 114.8(2) ?
    C4 C3 C2 . . 123.8(3) ?
    C5 C4 C3 . . 119.0(3) ?
    C5 C4 H4 . . 120.5 ?
    C3 C4 H4 . . 120.5 ?
    C4 C5 C6 . . 119.8(3) ?
    C4 C5 H5 . . 120.1 ?
    C6 C5 H5 . . 120.1 ?
    C7 C6 C5 . . 118.7(3) ?
    C7 C6 H6 . . 120.7 ?
    C5 C6 H6 . . 120.7 ?
    N2 C7 C6 . . 121.3(2) ?
    N2 C7 C8 . . 114.4(2) ?
    C6 C7 C8 . . 124.3(2) ?
    N3 C8 C9 . . 124.6(3) ?
    N3 C8 C7 . . 116.5(2) ?
    C9 C8 C7 . . 119.0(2) ?
    C8 C9 H9A . . 109.5 ?
    C8 C9 H9B . . 109.5 ?
    H9A C9 H9B . . 109.5 ?
    C8 C9 H9C . . 109.5 ?
    H9A C9 H9C . . 109.5 ?
    H9B C9 H9C . . 109.5 ?
    N1 C10 C11 . . 110.9(2) ?
    N1 C10 H10A . . 109.5 ?
    C11 C10 H10A . . 109.5 ?
    N1 C10 H10B . . 109.5 ?
    C11 C10 H10B . . 109.5 ?
    H10A C10 H10B . . 108.0 ?
    C10 C11 C12 . . 111.2(2) ?
    C10 C11 H11A . . 109.4 ?
    C12 C11 H11A . . 109.4 ?
    C10 C11 H11B . . 109.4 ?
    C12 C11 H11B . . 109.4 ?
    H11A C11 H11B . . 108.0 ?
    C11 C12 P1 . . 111.5(2) ?
    C11 C12 H12A . . 109.3 ?
    P1 C12 H12A . . 109.3 ?
    C11 C12 H12B . . 109.3 ?
    P1 C12 H12B . . 109.3 ?
    H12A C12 H12B . . 108.0 ?
    C18 C13 C14 . . 118.2(3) ?
    C18 C13 P1 . . 117.7(2) ?
    C14 C13 P1 . . 124.1(2) ?
    C15 C14 C13 . . 120.8(3) ?
    C15 C14 H14 . . 119.6 ?
    C13 C14 H14 . . 119.6 ?
    C16 C15 C14 . . 120.1(3) ?
    C16 C15 H15 . . 120.0 ?
    C14 C15 H15 . . 120.0 ?
    C17 C16 C15 . . 119.8(3) ?
    C17 C16 H16 . . 120.1 ?
    C15 C16 H16 . . 120.1 ?
    C16 C17 C18 . . 120.1(3) ?
    C16 C17 H17 . . 120.0 ?
    C18 C17 H17 . . 120.0 ?
    C17 C18 C13 . . 121.1(3) ?
    C17 C18 H18 . . 119.5 ?
    C13 C18 H18 . . 119.5 ?
    C20 C19 C24 . . 117.8(3) ?
    C20 C19 P1 . . 124.6(2) ?
    C24 C19 P1 . . 117.6(2) ?
    C21 C20 C19 . . 121.0(3) ?
    C21 C20 H20 . . 119.5 ?
    C19 C20 H20 . . 119.5 ?
    C20 C21 C22 . . 120.3(3) ?
    C20 C21 H21 . . 119.9 ?
    C22 C21 H21 . . 119.9 ?
    C23 C22 C21 . . 119.7(3) ?
    C23 C22 H22 . . 120.1 ?
    C21 C22 H22 . . 120.1 ?
    C22 C23 C24 . . 119.9(3) ?
    C22 C23 H23 . . 120.1 ?
    C24 C23 H23 . . 120.1 ?
    C23 C24 C19 . . 121.2(3) ?
    C23 C24 H24 . . 119.4 ?
    C19 C24 H24 . . 119.4 ?
    N3 C25 C26 . . 109.9(2) ?
    N3 C25 H25A . . 109.7 ?
    C26 C25 H25A . . 109.7 ?
    N3 C25 H25B . . 109.7 ?
    C26 C25 H25B . . 109.7 ?
    H25A C25 H25B . . 108.2 ?
    C25 C26 C27 . . 113.2(2) ?
    C25 C26 H26A . . 108.9 ?
    C27 C26 H26A . . 108.9 ?
    C25 C26 H26B . . 108.9 ?
    C27 C26 H26B . . 108.9 ?
    H26A C26 H26B . . 107.8 ?
    C26 C27 P2 . . 111.16(18) ?
    C26 C27 H27A . . 109.4 ?
    P2 C27 H27A . . 109.4 ?
    C26 C27 H27B . . 109.4 ?
    P2 C27 H27B . . 109.4 ?
    H27A C27 H27B . . 108.0 ?
    C33 C28 C29 . . 118.4(3) ?
    C33 C28 P2 . . 124.5(2) ?
    C29 C28 P2 . . 117.0(2) ?
    C30 C29 C28 . . 120.5(3) ?
    C30 C29 H29 . . 119.8 ?
    C28 C29 H29 . . 119.8 ?
    C31 C30 C29 . . 120.3(3) ?
    C31 C30 H30 . . 119.9 ?
    C29 C30 H30 . . 119.9 ?
    C30 C31 C32 . . 120.2(3) ?
    C30 C31 H31 . . 119.9 ?
    C32 C31 H31 . . 119.9 ?
    C31 C32 C33 . . 119.9(3) ?
    C31 C32 H32 . . 120.0 ?
    C33 C32 H32 . . 120.0 ?
    C32 C33 C28 . . 120.6(3) ?
    C32 C33 H33 . . 119.7 ?
    C28 C33 H33 . . 119.7 ?
    C39 C34 C35 . . 118.2(3) ?
    C39 C34 P2 . . 124.5(2) ?
    C35 C34 P2 . . 117.2(2) ?
    C36 C35 C34 . . 121.1(3) ?
    C36 C35 H35 . . 119.5 ?
    C34 C35 H35 . . 119.5 ?
    C35 C36 C37 . . 119.8(3) ?
    C35 C36 H36 . . 120.1 ?
    C37 C36 H36 . . 120.1 ?
    C38 C37 C36 . . 119.8(3) ?
    C38 C37 H37 . . 120.1 ?
    C36 C37 H37 . . 120.1 ?
    C39 C38 C37 . . 120.1(3) ?
    C39 C38 H38 . . 120.0 ?
    C37 C38 H38 . . 120.0 ?
    C38 C39 C34 . . 120.9(3) ?
    C38 C39 H39 . . 119.5 ?
    C34 C39 H39 . . 119.5 ?
    C5A O1A C2A . . 109.5 ?
    O1A C2A C3A . . 106.4 ?
    O1A C2A H2AA . . 110.4 ?
    C3A C2A H2AA . . 110.4 ?
    O1A C2A H2AB . . 110.4 ?
    C3A C2A H2AB . . 110.4 ?
    H2AA C2A H2AB . . 108.6 ?
    C2A C3A C4A . . 101.5 ?
    C2A C3A H3AA . . 111.5 ?
    C4A C3A H3AA . . 111.5 ?
    C2A C3A H3AB . . 111.5 ?
    C4A C3A H3AB . . 111.5 ?
    H3AA C3A H3AB . . 109.3 ?
    C5A C4A C3A . . 101.5 ?
    C5A C4A H4AA . . 111.5 ?
    C3A C4A H4AA . . 111.5 ?
    C5A C4A H4AB . . 111.5 ?
    C3A C4A H4AB . . 111.5 ?
    H4AA C4A H4AB . . 109.3 ?
    O1A C5A C4A . . 106.4 ?
    O1A C5A H5AA . . 110.4 ?
    C4A C5A H5AA . . 110.4 ?
    O1A C5A H5AB . . 110.4 ?
    C4A C5A H5AB . . 110.4 ?
    H5AA C5A H5AB . . 108.6 ?
    C2B O1B C5B . . 109.5 ?
    O1B C2B C3B . . 106.4 ?
    O1B C2B H2BA . . 110.4 ?
    C3B C2B H2BA . . 110.4 ?
    O1B C2B H2BB . . 110.4 ?
    C3B C2B H2BB . . 110.4 ?
    H2BA C2B H2BB . . 108.6 ?
    C2B C3B C4B . . 101.5 ?
    C2B C3B H3BA . . 111.5 ?
    C4B C3B H3BA . . 111.5 ?
    C2B C3B H3BB . . 111.5 ?
    C4B C3B H3BB . . 111.5 ?
    H3BA C3B H3BB . . 109.3 ?
    C5B C4B C3B . . 101.5 ?
    C5B C4B H4BA . . 111.5 ?
    C3B C4B H4BA . . 111.5 ?
    C5B C4B H4BB . . 111.5 ?
    C3B C4B H4BB . . 111.5 ?
    H4BA C4B H4BB . . 109.3 ?
    O1B C5B C4B . . 106.4 ?
    O1B C5B H5BA . . 110.4 ?
    C4B C5B H5BA . . 110.4 ?
    O1B C5B H5BB . . 110.4 ?
    C4B C5B H5BB . . 110.4 ?
    H5BA C5B H5BB . . 108.6 ?
    C2C O1C C5C . . 109.5 ?
    O1C C2C C3C . . 106.4 ?
    O1C C2C H2CA . . 110.4 ?
    C3C C2C H2CA . . 110.4 ?
    O1C C2C H2CB . . 110.4 ?
    C3C C2C H2CB . . 110.4 ?
    H2CA C2C H2CB . . 108.6 ?
    C2C C3C C4C . . 101.5 ?
    C2C C3C H3CA . . 111.5 ?
    C4C C3C H3CA . . 111.5 ?
    C2C C3C H3CB . . 111.5 ?
    C4C C3C H3CB . . 111.5 ?
    H3CA C3C H3CB . . 109.3 ?
    C5C C4C C3C . . 101.5 ?
    C5C C4C H4CA . . 111.5 ?
    C3C C4C H4CA . . 111.5 ?
    C5C C4C H4CB . . 111.5 ?
    C3C C4C H4CB . . 111.5 ?
    H4CA C4C H4CB . . 109.3 ?
    O1C C5C C4C . . 106.4 ?
    O1C C5C H5CA . . 110.4 ?
    C4C C5C H5CA . . 110.4 ?
    O1C C5C H5CB . . 110.4 ?
    C4C C5C H5CB . . 110.4 ?
    H5CA C5C H5CB . . 108.6 ?


# start Validation Reply Form
_vrf_PLAT413_Ph2PPrPDIMnCl2
;
PROBLEM: Short Inter XH3 .. XHn     H24    ..  H3BB    ..       1.88 Ang. 
RESPONSE: H3BB is part of a severely disordered THF site, modeled with
three partially occupied orientations, which happen to be very near the
main molecule.
;
_vrf_PLAT411_Ph2PPrPDIMnCl2
;
PROBLEM: Short Inter H...H Contact  H15    ..  H2CA    ..       1.80 Ang. 
RESPONSE: H2CA is part of a severely disordered THF site, modeled with
three partially occupied orientations, which happen to be very near the
main molecule.
;
# end Validation Reply Form

 
_iucr_refine_instructions_details
;
TITL 1_228_0m in C2/c
CELL 0.71073  16.9540  12.1473  37.0711  90.000 100.276  90.000
ZERR    8.00   0.0007   0.0005   0.0015   0.000   0.001   0.000
LATT 7
SYMM -X, Y, 0.5-Z
SFAC C  H  N  P  Cl Mn O
UNIT 328  360  24  16  16  8  4
ACTA
L.S. 20
BOND $H
FMAP 2
PLAN 10
SHEL 999 0.83
SIZE 0.05 0.18 0.20
SUMP 1 0.00000  1 2  1 3  1 4
EADP O1A C2A C3A C4A C5A O1B C2B C3B C4B C5B O1C C2C C3C C4C C5C
TEMP -150.000
WGHT    0.034400   18.648401
FVAR       0.03565   0.66994   0.22620   0.10387
MN1   6    0.283615    0.236136    0.099211    11.00000    0.02753    0.01554 =
         0.01692    0.00001    0.00883    0.00015
P1    4    0.136276    0.273184    0.252728    11.00000    0.02502    0.02289 =
         0.01885   -0.00230    0.00611    0.00020
P2    4    0.327719    0.571706   -0.000311    11.00000    0.02123    0.02082 =
         0.01966    0.00166    0.00779    0.00136
CL1   5    0.395977    0.311167    0.137742    11.00000    0.03047    0.02797 =
         0.02290   -0.00080    0.00815   -0.00587
CL2   5    0.187001    0.372548    0.076645    11.00000    0.02973    0.02271 =
         0.02382    0.00383    0.01008    0.00412
N1    3    0.212921    0.180136    0.143449    11.00000    0.02494    0.02284 =
         0.01528    0.00099    0.00549    0.00287
N2    3    0.280467    0.055397    0.099677    11.00000    0.02636    0.01831 =
         0.01665   -0.00010    0.00639   -0.00238
N3    3    0.340364    0.169086    0.050525    11.00000    0.02522    0.01871 =
         0.01421    0.00000    0.00529   -0.00084
C1    1    0.161382    0.021741    0.175057    11.00000    0.04192    0.02882 =
         0.02992    0.00402    0.01874    0.00104
AFIX 137
H1A   2    0.138548    0.078049    0.189095    11.00000   -1.50000
H1B   2    0.198663   -0.024407    0.191836    11.00000   -1.50000
H1C   2    0.118201   -0.024121    0.161765    11.00000   -1.50000
AFIX   0
C2    1    0.205547    0.076619    0.148119    11.00000    0.02615    0.02666 =
         0.01518    0.00228    0.00490   -0.00042
C3    1    0.245757    0.002998    0.124706    11.00000    0.02224    0.02159 =
         0.01755    0.00142    0.00356   -0.00172
C4    1    0.249580   -0.110449    0.128436    11.00000    0.02915    0.02250 =
         0.02207    0.00503    0.00379   -0.00293
AFIX  43
H4    2    0.224040   -0.146459    0.145984    11.00000   -1.20000
AFIX   0
C5    1    0.290764   -0.169963    0.106430    11.00000    0.03350    0.01564 =
         0.02736    0.00203    0.00262   -0.00088
AFIX  43
H5    2    0.294223   -0.247785    0.108720    11.00000   -1.20000
AFIX   0
C6    1    0.327381   -0.116205    0.080804    11.00000    0.02816    0.02216 =
         0.02278   -0.00241    0.00477    0.00248
AFIX  43
H6    2    0.356486   -0.156396    0.065523    11.00000   -1.20000
AFIX   0
C7    1    0.320654   -0.002640    0.077939    11.00000    0.02203    0.02051 =
         0.01601   -0.00287    0.00316   -0.00172
C8    1    0.355069    0.065539    0.050692    11.00000    0.02221    0.02342 =
         0.01603   -0.00331    0.00378   -0.00106
C9    1    0.403699    0.009750    0.025917    11.00000    0.03692    0.02371 =
         0.03126   -0.00170    0.01823    0.00150
AFIX 137
H9A   2    0.374810    0.013026    0.000567    11.00000   -1.50000
H9B   2    0.412574   -0.067339    0.033336    11.00000   -1.50000
H9C   2    0.455466    0.047138    0.027673    11.00000   -1.50000
AFIX   0
C10   1    0.179275    0.259630    0.166266    11.00000    0.03297    0.02505 =
         0.01752    0.00194    0.01035    0.00603
AFIX  23
H10A  2    0.129144    0.229674    0.172563    11.00000   -1.20000
H10B  2    0.165998    0.328699    0.152327    11.00000   -1.20000
AFIX   0
C11   1    0.238240    0.284152    0.201226    11.00000    0.03153    0.02745 =
         0.02087   -0.00049    0.01082    0.00331
AFIX  23
H11A  2    0.285457    0.322877    0.195044    11.00000   -1.20000
H11B  2    0.256929    0.214116    0.213512    11.00000   -1.20000
AFIX   0
C12   1    0.199555    0.355725    0.227517    11.00000    0.03209    0.02464 =
         0.01883   -0.00090    0.00980    0.00298
AFIX  23
H12A  2    0.166516    0.413674    0.213351    11.00000   -1.20000
H12B  2    0.242136    0.392354    0.245202    11.00000   -1.20000
AFIX   0
C13   1    0.102368    0.376568    0.282984    11.00000    0.02044    0.02623 =
         0.01764   -0.00179    0.00238    0.00371
C14   1    0.118976    0.488456    0.281831    11.00000    0.03192    0.03140 =
         0.02560    0.00025    0.01222    0.00304
AFIX  43
H14   2    0.149005    0.515379    0.264374    11.00000   -1.20000
AFIX   0
C15   1    0.092224    0.561386    0.305876    11.00000    0.03541    0.02273 =
         0.03754   -0.00381    0.00790    0.00351
AFIX  43
H15   2    0.104196    0.637603    0.304861    11.00000   -1.20000
AFIX   0
C16   1    0.048200    0.523156    0.331281    11.00000    0.02748    0.03396 =
         0.02633   -0.00696    0.00663    0.00788
AFIX  43
H16   2    0.030688    0.572771    0.348026    11.00000   -1.20000
AFIX   0
C17   1    0.029809    0.412861    0.332231    11.00000    0.02915    0.03900 =
         0.02598    0.00052    0.01274    0.00326
AFIX  43
H17   2   -0.001028    0.386496    0.349452    11.00000   -1.20000
AFIX   0
C18   1    0.056236    0.340281    0.308094    11.00000    0.02830    0.02777 =
         0.02704   -0.00203    0.00615    0.00062
AFIX  43
H18   2    0.042600    0.264536    0.308724    11.00000   -1.20000
AFIX   0
C19   1    0.211450    0.199565    0.286501    11.00000    0.03019    0.02021 =
         0.01967   -0.00378    0.00824    0.00449
C20   1    0.292883    0.222633    0.293260    11.00000    0.03229    0.02428 =
         0.02731   -0.00404    0.00501    0.00106
AFIX  43
H20   2    0.313164    0.278934    0.279648    11.00000   -1.20000
AFIX   0
C21   1    0.345048    0.164864    0.319538    11.00000    0.03665    0.03283 =
         0.03694   -0.00873   -0.00358    0.00574
AFIX  43
H21   2    0.400714    0.181304    0.323638    11.00000   -1.20000
AFIX   0
C22   1    0.316418    0.083135    0.339895    11.00000    0.04976    0.02806 =
         0.02383   -0.00280   -0.00083    0.01121
AFIX  43
H22   2    0.352128    0.044884    0.358345    11.00000   -1.20000
AFIX   0
C23   1    0.236369    0.057754    0.333289    11.00000    0.05398    0.02900 =
         0.03398    0.00994    0.02019    0.01356
AFIX  43
H23   2    0.216483    0.001465    0.347043    11.00000   -1.20000
AFIX   0
C24   1    0.184228    0.114641    0.306373    11.00000    0.03436    0.03113 =
         0.03725    0.00451    0.01431    0.00426
AFIX  43
H24   2    0.129080    0.095176    0.301473    11.00000   -1.20000
AFIX   0
C25   1    0.370877    0.237918    0.023185    11.00000    0.02562    0.02138 =
         0.01643   -0.00135    0.00746   -0.00499
AFIX  23
H25A  2    0.351305    0.208659   -0.001729    11.00000   -1.20000
H25B  2    0.430199    0.235787    0.027771    11.00000   -1.20000
AFIX   0
C26   1    0.342710    0.355171    0.025590    11.00000    0.02620    0.02228 =
         0.01781    0.00053    0.00878   -0.00150
AFIX  23
H26A  2    0.364338    0.384444    0.050299    11.00000   -1.20000
H26B  2    0.283493    0.355734    0.022507    11.00000   -1.20000
AFIX   0
C27   1    0.368360    0.430721   -0.003116    11.00000    0.02473    0.01932 =
         0.01720   -0.00024    0.00676   -0.00045
AFIX  23
H27A  2    0.348949    0.400198   -0.027869    11.00000   -1.20000
H27B  2    0.427616    0.434004    0.000720    11.00000   -1.20000
AFIX   0
C28   1    0.391678    0.616155    0.042515    11.00000    0.02471    0.01552 =
         0.02360   -0.00174    0.00792    0.00375
C29   1    0.369761    0.580934    0.075369    11.00000    0.02799    0.01876 =
         0.02651   -0.00427    0.00989   -0.00102
AFIX  43
H29   2    0.320551    0.543007    0.074803    11.00000   -1.20000
AFIX   0
C30   1    0.419296    0.601029    0.108599    11.00000    0.04260    0.02756 =
         0.02037   -0.00308    0.00678    0.00354
AFIX  43
H30   2    0.405301    0.573546    0.130608    11.00000   -1.20000
AFIX   0
C31   1    0.488814    0.660704    0.109915    11.00000    0.03686    0.03191 =
         0.02901   -0.01019   -0.00169    0.00176
AFIX  43
H31   2    0.522526    0.674435    0.132823    11.00000   -1.20000
AFIX   0
C32   1    0.509647    0.700636    0.078023    11.00000    0.02688    0.02675 =
         0.04093   -0.00837    0.00593   -0.00097
AFIX  43
H32   2    0.556683    0.743892    0.079068    11.00000   -1.20000
AFIX   0
C33   1    0.461731    0.677483    0.044386    11.00000    0.02525    0.02048 =
         0.02959   -0.00031    0.01071    0.00483
AFIX  43
H33   2    0.476898    0.703729    0.022468    11.00000   -1.20000
AFIX   0
C34   1    0.372371    0.646090   -0.034621    11.00000    0.02462    0.02240 =
         0.01722    0.00286    0.00361    0.00015
C35   1    0.354604    0.758136   -0.039175    11.00000    0.02966    0.02131 =
         0.02609   -0.00123    0.00492    0.00162
AFIX  43
H35   2    0.320567    0.791934   -0.024647    11.00000   -1.20000
AFIX   0
C36   1    0.385834    0.820702   -0.064537    11.00000    0.03489    0.02118 =
         0.03050    0.00664   -0.00013    0.00092
AFIX  43
H36   2    0.373644    0.896937   -0.067147    11.00000   -1.20000
AFIX   0
C37   1    0.434939    0.771742   -0.086104    11.00000    0.02955    0.03449 =
         0.02348    0.01097    0.00345   -0.00619
AFIX  43
H37   2    0.457233    0.814628   -0.103222    11.00000   -1.20000
AFIX   0
C38   1    0.451418    0.660030   -0.082622    11.00000    0.02568    0.03366 =
         0.02220    0.00111    0.00473    0.00064
AFIX  43
H38   2    0.483830    0.625959   -0.097848    11.00000   -1.20000
AFIX   0
C39   1    0.420701    0.598079   -0.056985    11.00000    0.02379    0.02270 =
         0.02299    0.00247    0.00385    0.00044
AFIX  43
H39   2    0.432750    0.521761   -0.054612    11.00000   -1.20000
 
AFIX   6
PART  -1
O1A   7    0.425301    0.399698    0.266985    20.50000    0.03867    0.05666 =
         0.04100   -0.01611    0.01662   -0.01007
C2A   1    0.440088    0.314591    0.241843    20.50000    0.03867    0.05666 =
         0.04100   -0.01611    0.01662   -0.01007
AFIX  23
H2AA  2    0.404516    0.324150    0.217795    20.50000   -1.20000
H2AB  2    0.430155    0.241033    0.251627    20.50000   -1.20000
AFIX   5
C3A   1    0.528262    0.325994    0.237820    20.50000    0.03867    0.05666 =
         0.04100   -0.01611    0.01662   -0.01007
AFIX  23
H3AA  2    0.536817    0.301321    0.213359    20.50000   -1.20000
H3AB  2    0.564028    0.283960    0.256999    20.50000   -1.20000
AFIX   5
C4A   1    0.541315    0.450839    0.242767    20.50000    0.03867    0.05666 =
         0.04100   -0.01611    0.01662   -0.01007
AFIX  23
H4AA  2    0.598615    0.468730    0.251178    20.50000   -1.20000
H4AB  2    0.521173    0.491264    0.219780    20.50000   -1.20000
AFIX   5
C5A   1    0.491323    0.476476    0.272421    20.50000    0.03867    0.05666 =
         0.04100   -0.01611    0.01662   -0.01007
AFIX  23
H5AA  2    0.524118    0.467215    0.297146    20.50000   -1.20000
H5AB  2    0.471233    0.553121    0.269950    20.50000   -1.20000
 
AFIX   6
PART  -2
O1B   7    0.469650    0.287358    0.264365    30.50000    0.03867    0.05666 =
         0.04100   -0.01611    0.01662   -0.01007
C2B   1    0.424991    0.385637    0.269374    30.50000    0.03867    0.05666 =
         0.04100   -0.01611    0.01662   -0.01007
AFIX  23
H2BA  2    0.445380    0.419028    0.293605    30.50000   -1.20000
H2BB  2    0.367469    0.368137    0.267882    30.50000   -1.20000
AFIX   5
C3B   1    0.436627    0.464846    0.238494    30.50000    0.03867    0.05666 =
         0.04100   -0.01611    0.01662   -0.01007
AFIX  23
H3BA  2    0.433875    0.542638    0.246136    30.50000   -1.20000
H3BB  2    0.396329    0.451954    0.216063    30.50000   -1.20000
AFIX   5
C4B   1    0.521477    0.433926    0.232679    30.50000    0.03867    0.05666 =
         0.04100   -0.01611    0.01662   -0.01007
AFIX  23
H4BA  2    0.529888    0.453603    0.207727    30.50000   -1.20000
H4BB  2    0.563116    0.469925    0.251007    30.50000   -1.20000
AFIX   5
C5B   1    0.521246    0.308669    0.238109    30.50000    0.03867    0.05666 =
         0.04100   -0.01611    0.01662   -0.01007
AFIX  23
H5BA  2    0.500610    0.271175    0.214608    30.50000   -1.20000
H5BB  2    0.576190    0.281736    0.247488    30.50000   -1.20000
 
AFIX   6
PART  -3
O1C   7    0.449243    0.286849    0.265673    40.50000    0.03867    0.05666 =
         0.04100   -0.01611    0.01662   -0.01007
C2C   1    0.517615    0.288293    0.295100    40.50000    0.03867    0.05666 =
         0.04100   -0.01611    0.01662   -0.01007
AFIX  23
H2CA  2    0.566917    0.267785    0.285863    40.50000   -1.20000
H2CB  2    0.509843    0.235647    0.314549    40.50000   -1.20000
AFIX   5
C3C   1    0.524210    0.406311    0.310138    40.50000    0.03867    0.05666 =
         0.04100   -0.01611    0.01662   -0.01007
AFIX  23
H3CA  2    0.580472    0.426007    0.320253    40.50000   -1.20000
H3CB  2    0.490973    0.416749    0.329284    40.50000   -1.20000
AFIX   5
C4C   1    0.491674    0.473379    0.275462    40.50000    0.03867    0.05666 =
         0.04100   -0.01611    0.01662   -0.01007
AFIX  23
H4CA  2    0.470716    0.545707    0.281660    40.50000   -1.20000
H4CB  2    0.533287    0.484769    0.260187    40.50000   -1.20000
AFIX   5
C5C   1    0.424196    0.398333    0.256263    40.50000    0.03867    0.05666 =
         0.04100   -0.01611    0.01662   -0.01007
AFIX  23
H5CA  2    0.373402    0.414964    0.264809    40.50000   -1.20000
H5CB  2    0.415884    0.409028    0.229376    40.50000   -1.20000
PART   0
 
HKLF 4
 
REM  1_228_0m in C2/c
REM R1 =  0.0443 for   5693 Fo > 4sig(Fo)  and  0.0581 for all   6888 data
REM    453 parameters refined using      1 restraints
 
END  
     
WGHT      0.0344     18.6494 
REM Highest difference peak  0.511,  deepest hole -1.137,  1-sigma level  0.062
Q1    1   0.5133  0.3798  0.2238  11.00000  0.05    0.48
Q2    1   0.2287  0.3465  0.2719  11.00000  0.05    0.38
Q3    1   0.5000  0.3117  0.2500  10.50000  0.05    0.35
Q4    1   0.3605  0.6005  0.0224  11.00000  0.05    0.32
Q5    1   0.1322  0.3413  0.0688  11.00000  0.05    0.32
Q6    1   0.1527  0.4192  0.2917  11.00000  0.05    0.30
Q7    1   0.2782  0.5639  0.0064  11.00000  0.05    0.29
Q8    1   0.3497  0.4975  0.0003  11.00000  0.05    0.28
Q9    1   0.1713  0.3325  0.2435  11.00000  0.05    0.27
Q10   1   0.3615  0.6949 -0.0385  11.00000  0.05    0.27
;
